# Supplementary material
Source: PubMed Central journal article supplement (PMC5641220)

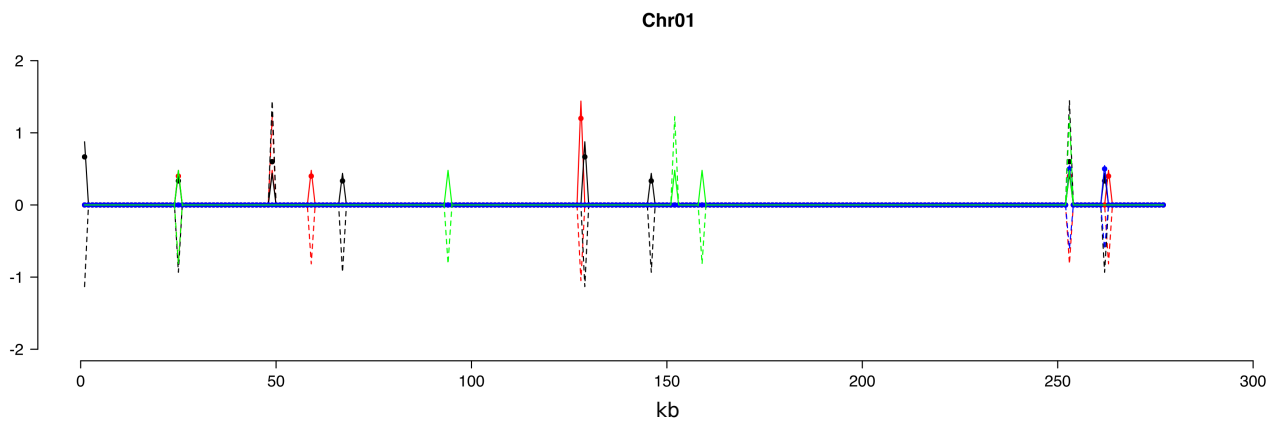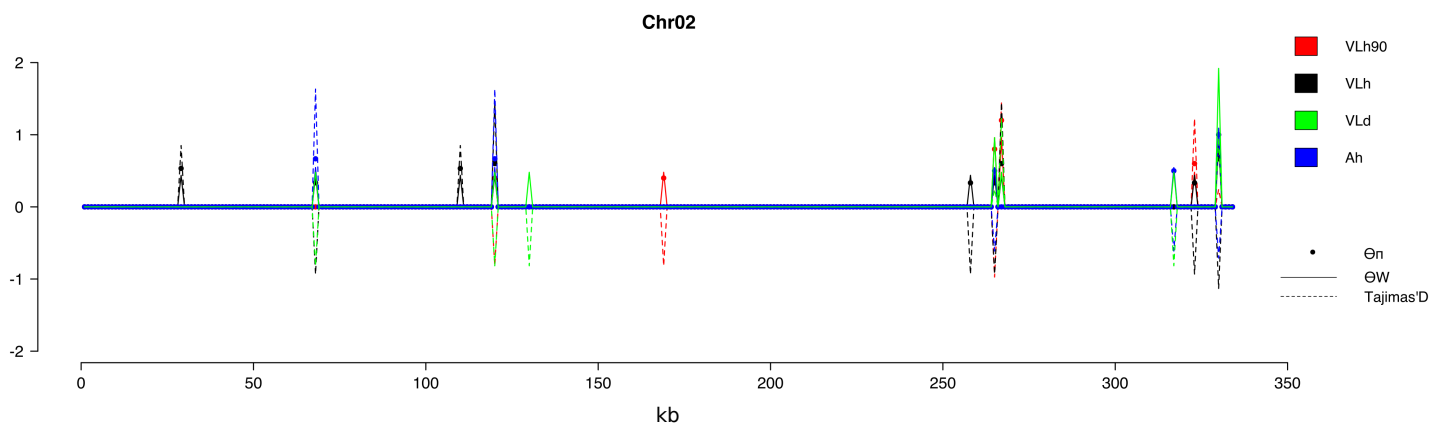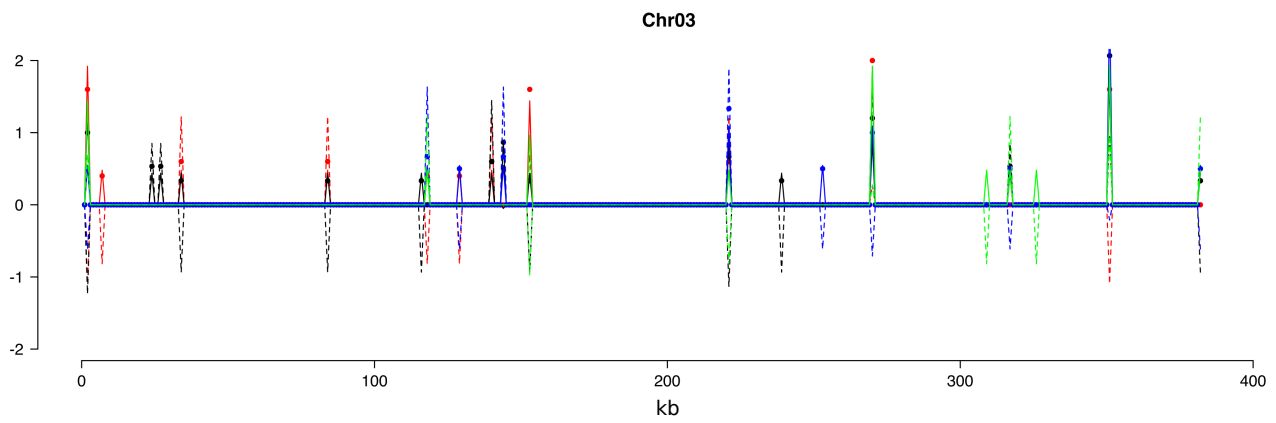

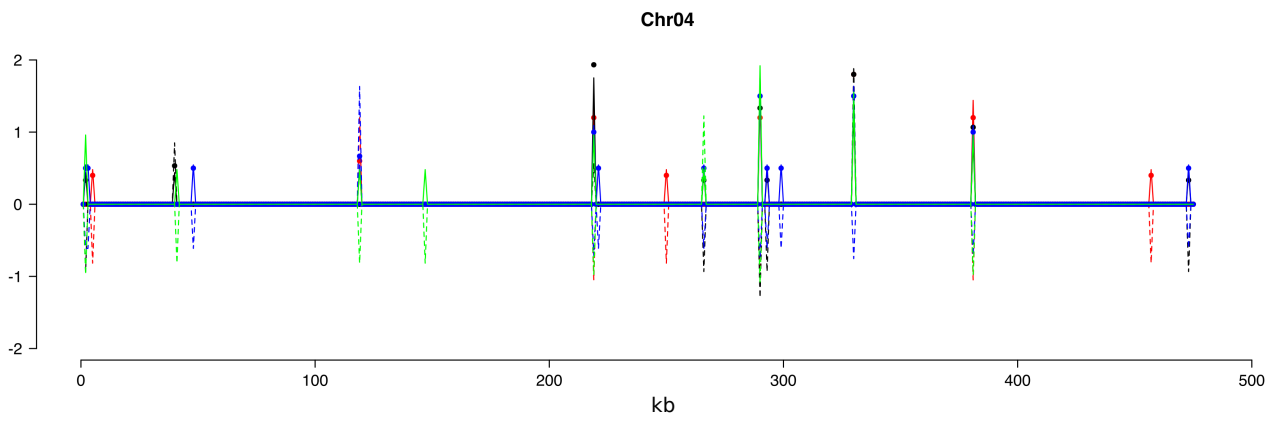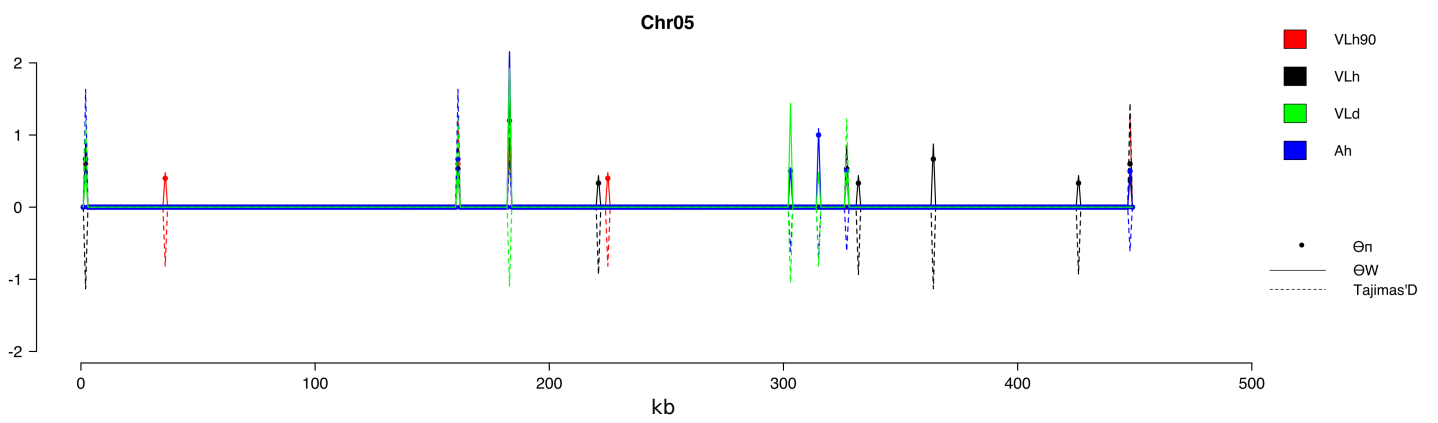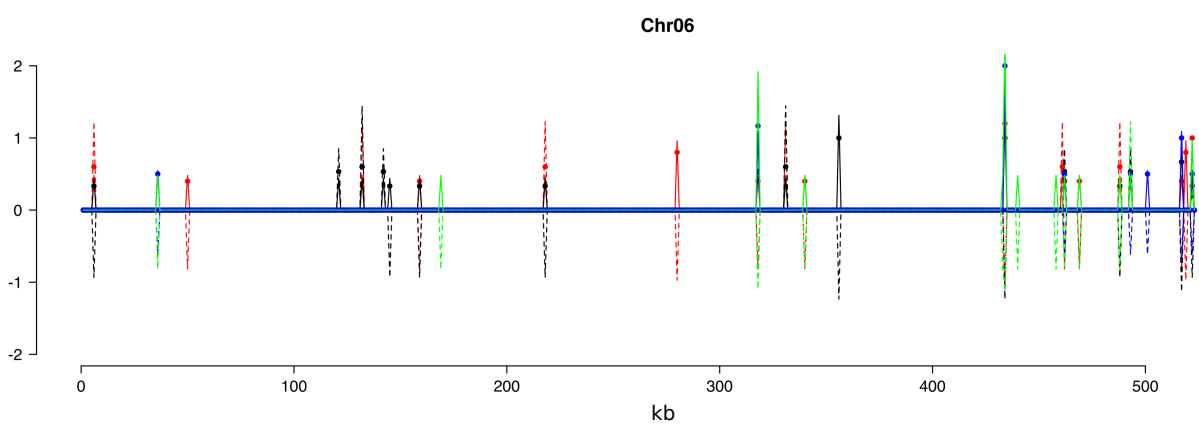

Chr07

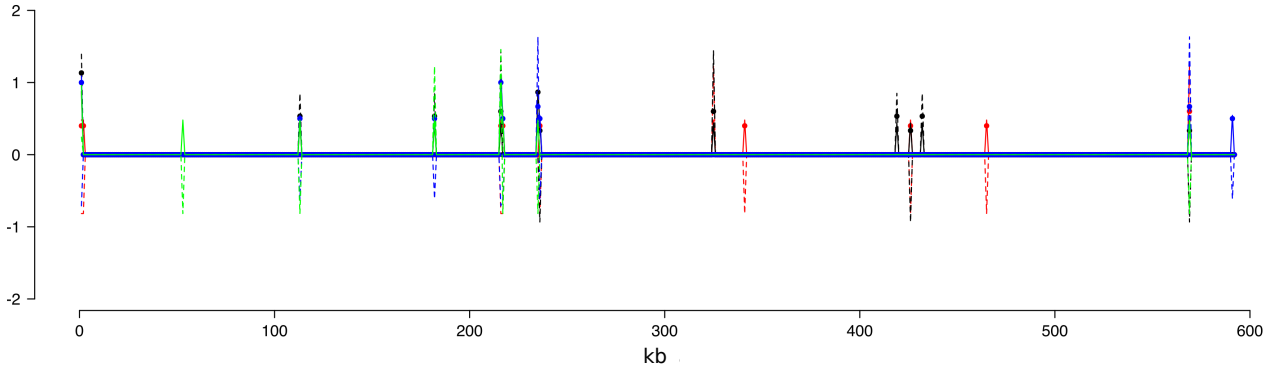

Chr08

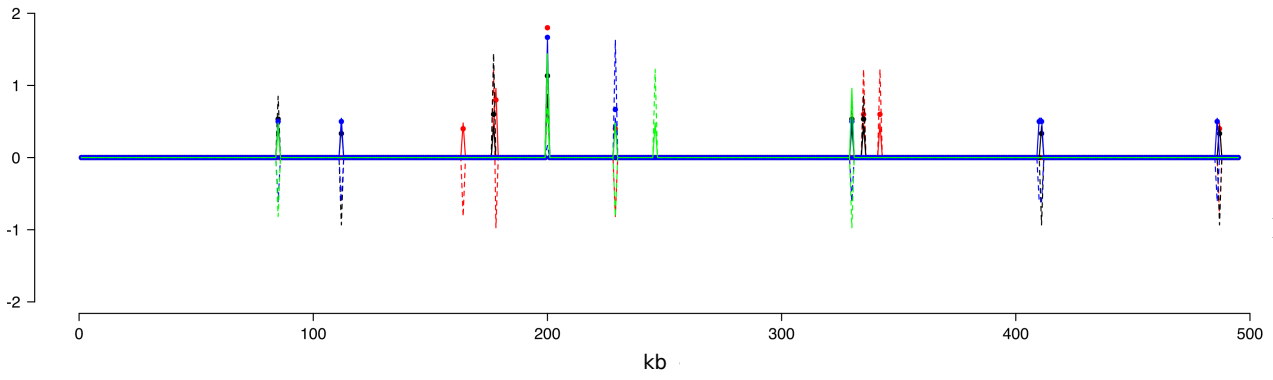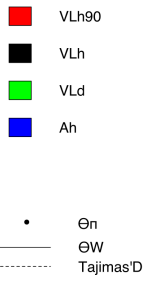

Chr09

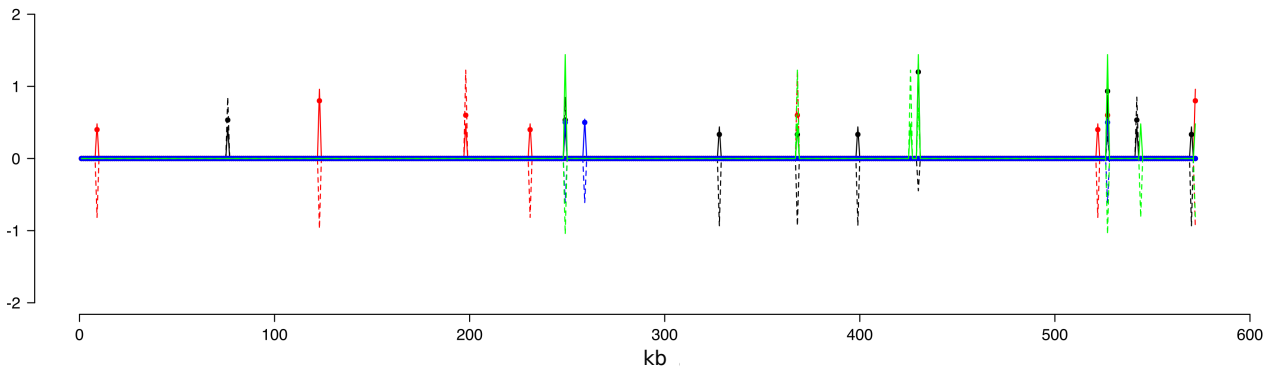

Chr10

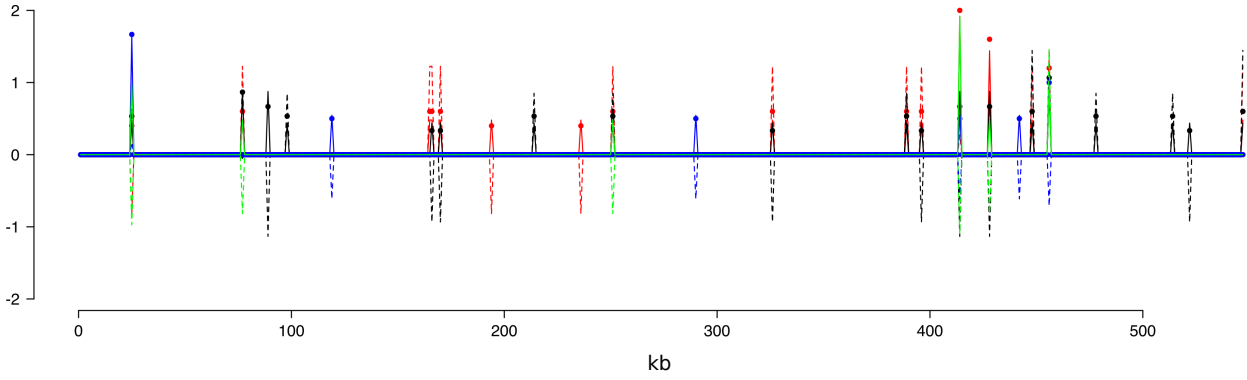

Chr11

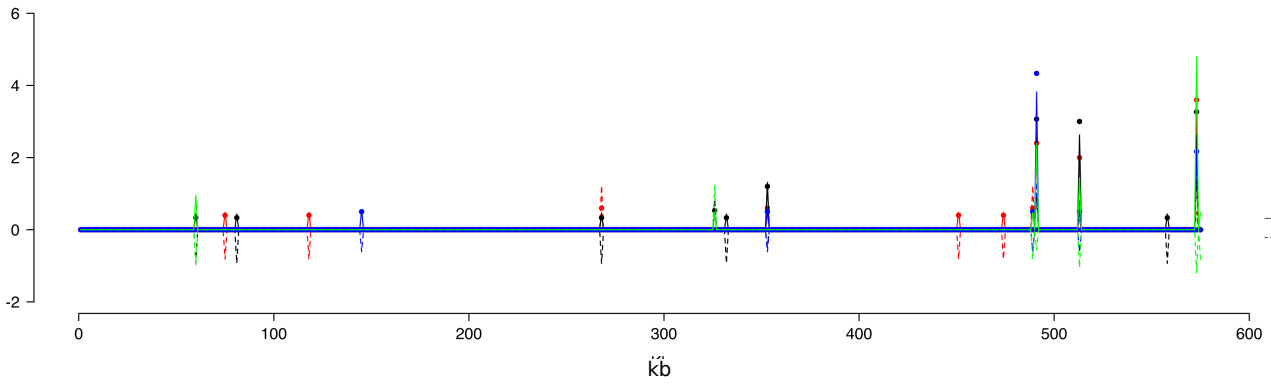

Chr12

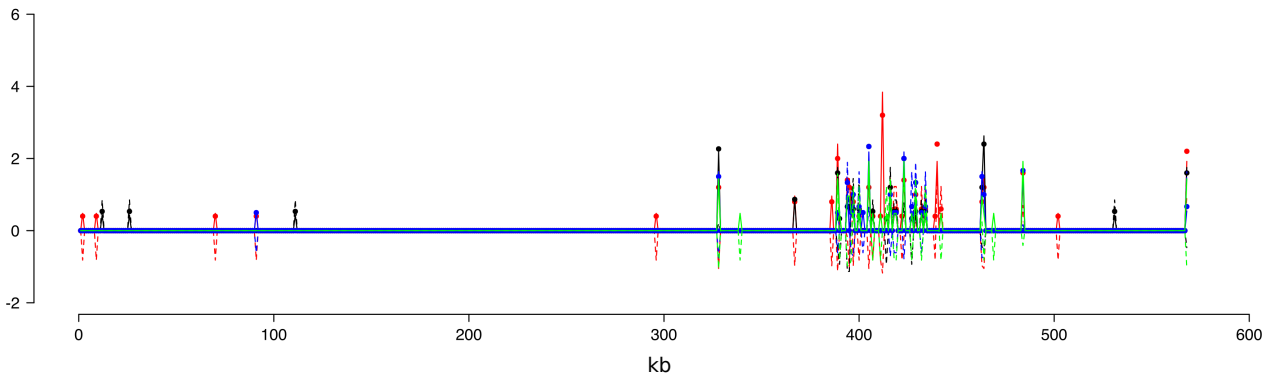

### Chr13

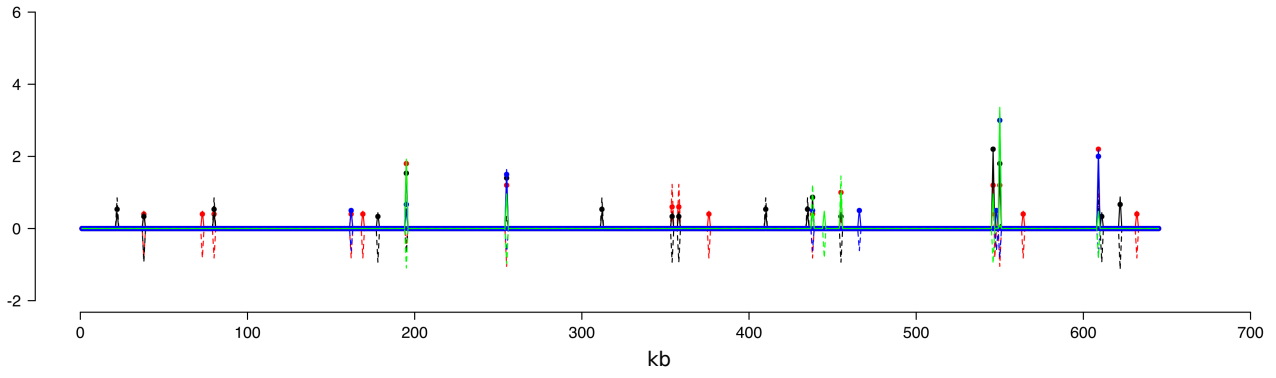

### Chr14

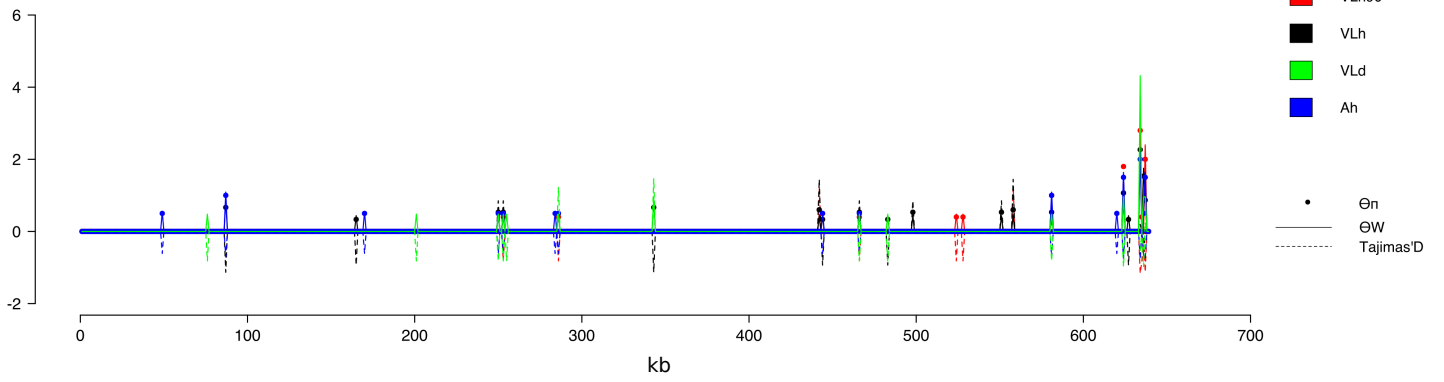

### Chr15

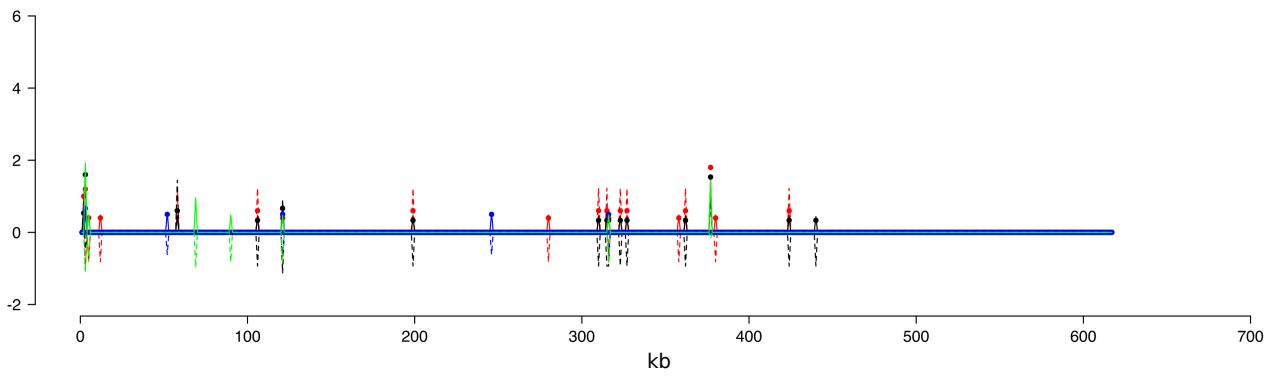

Chr16

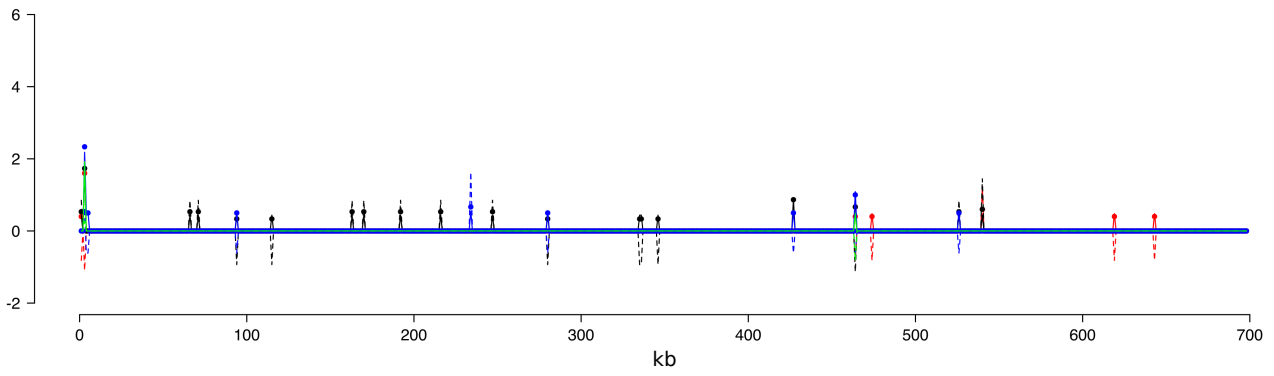

Chr17

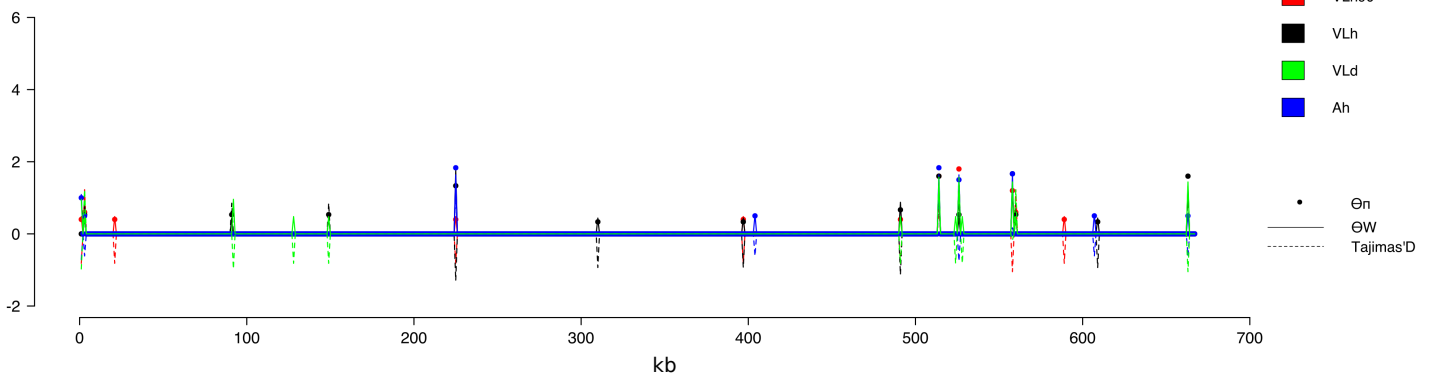

Chr18

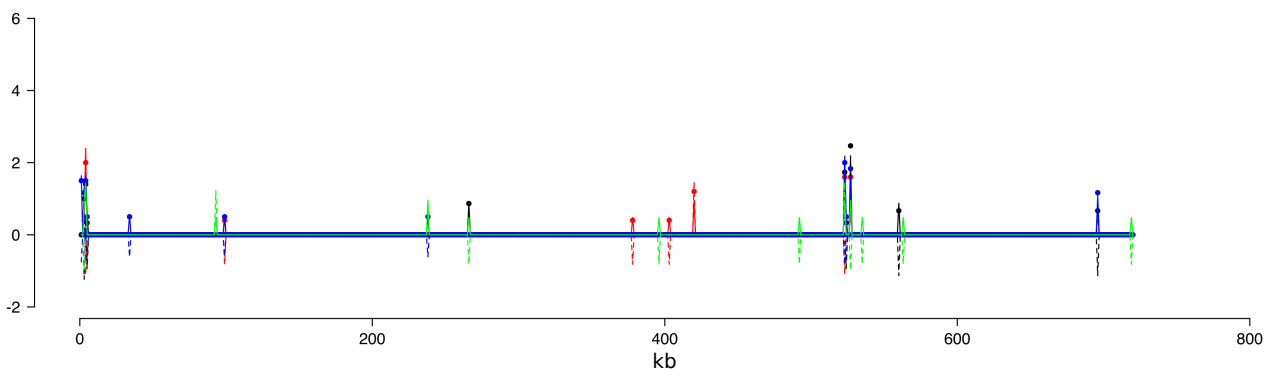

Chr19

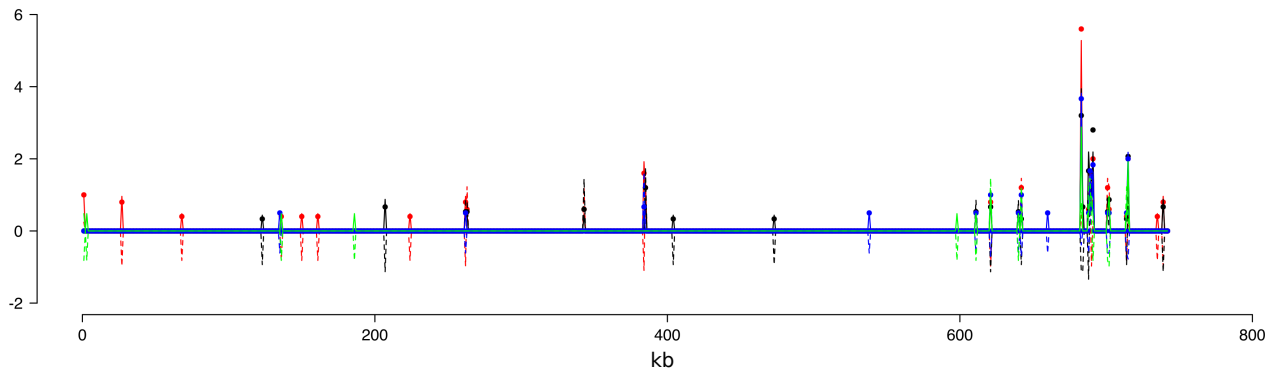

Chr20

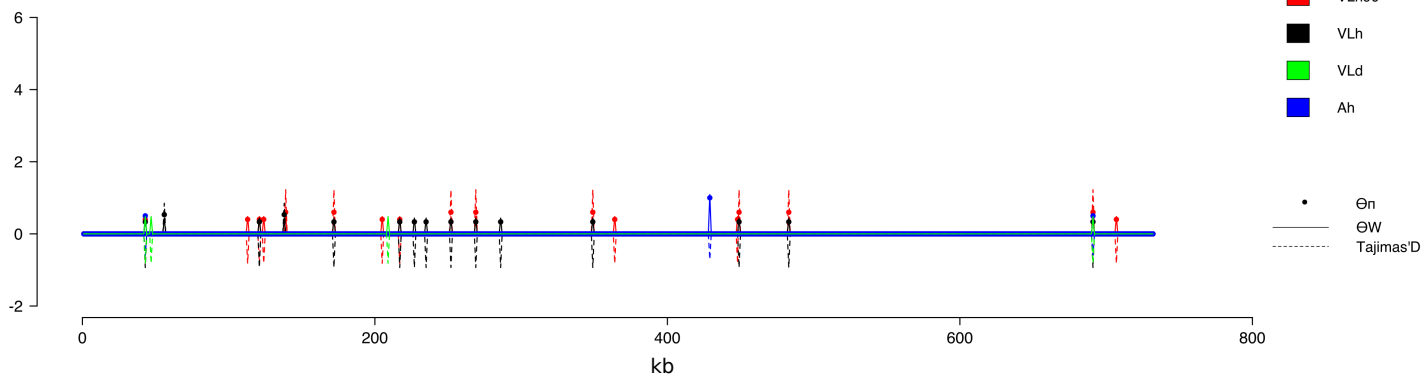

Chr21

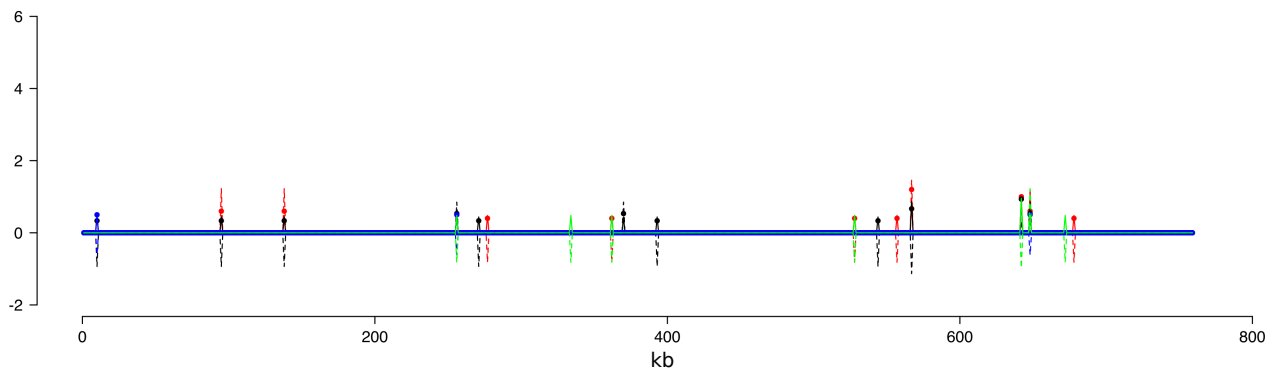

Chr22

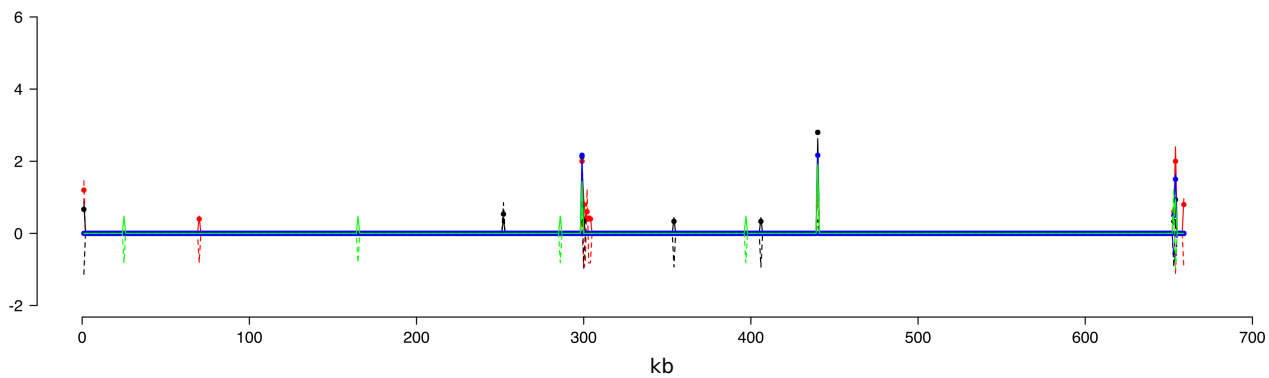

Chr23

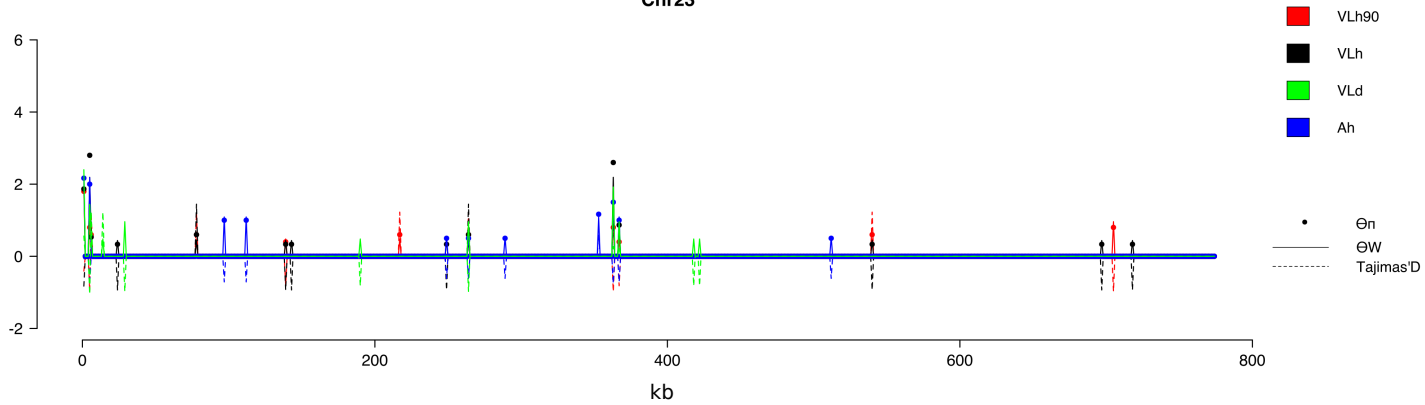

Chr24

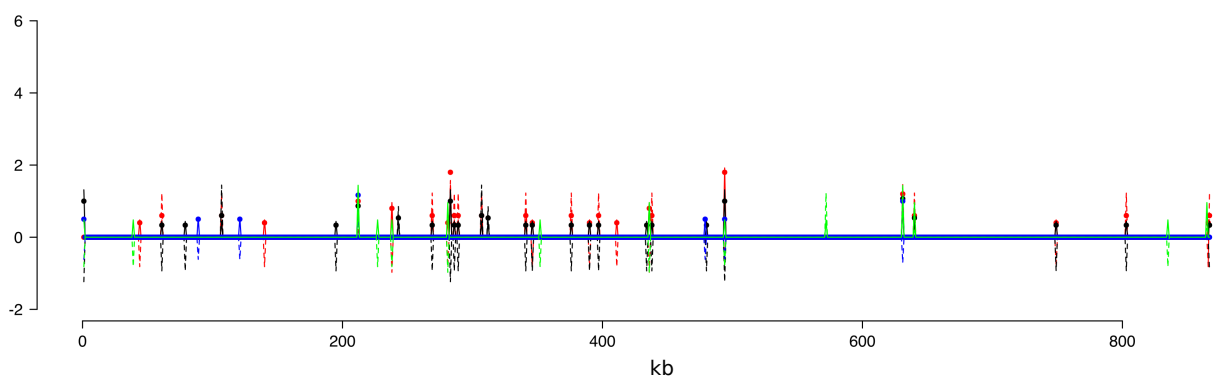



Chr25

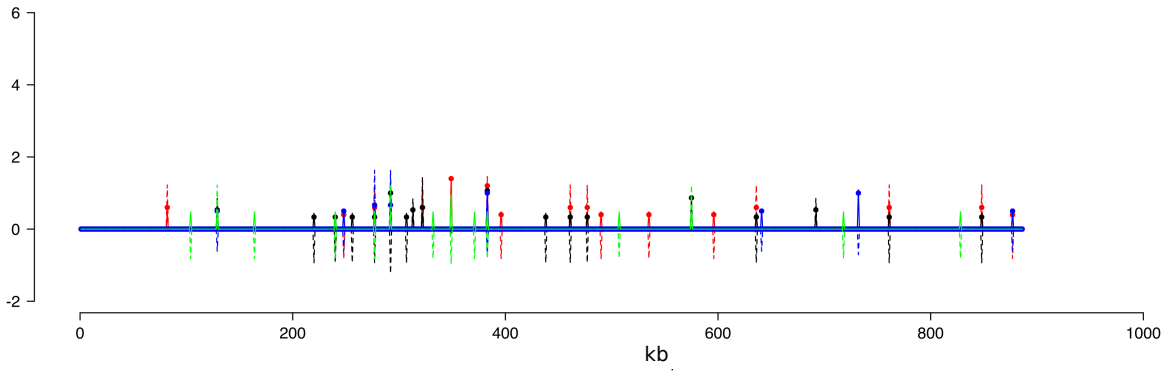

Chr26

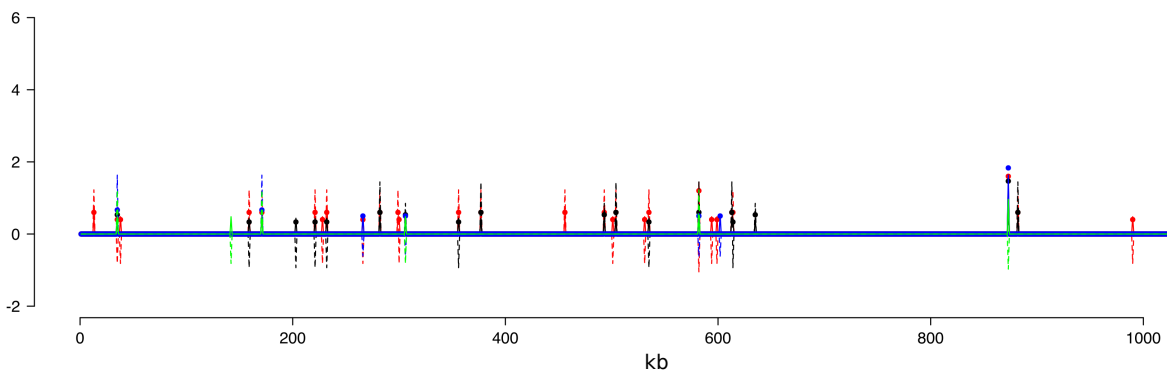

Chr27

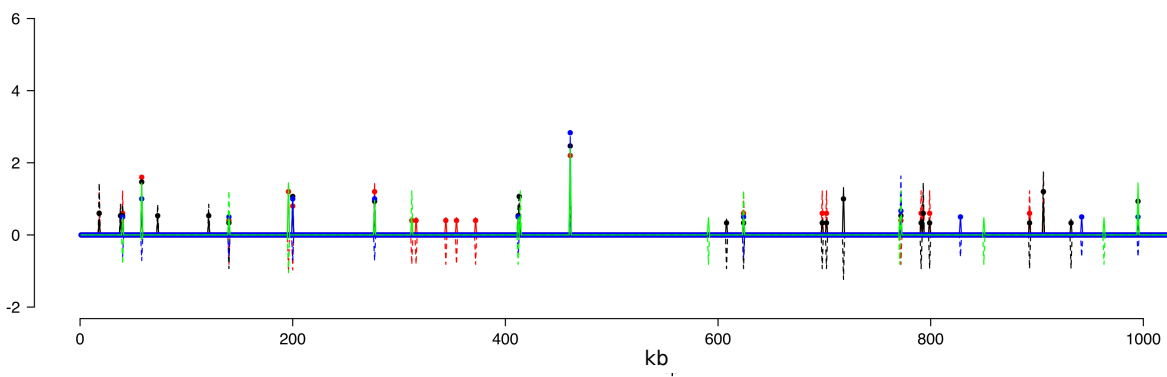

Chr28

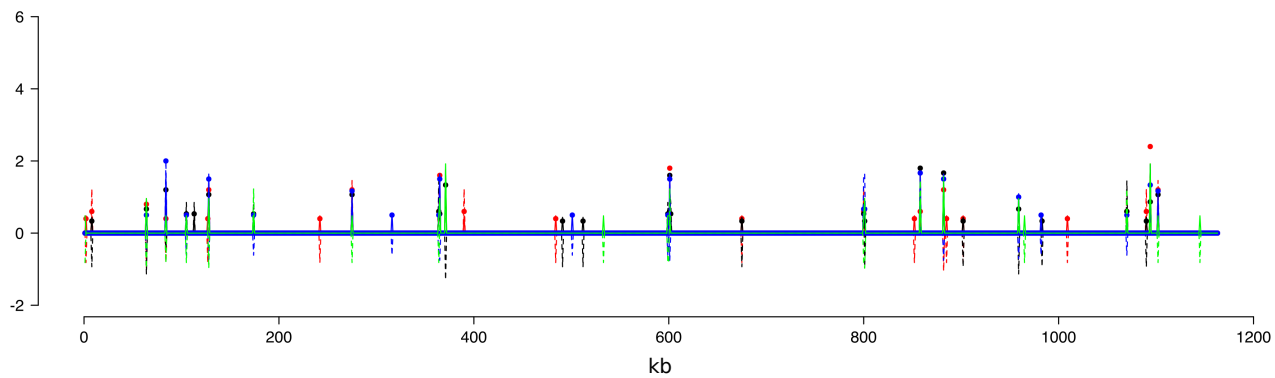

Chr29

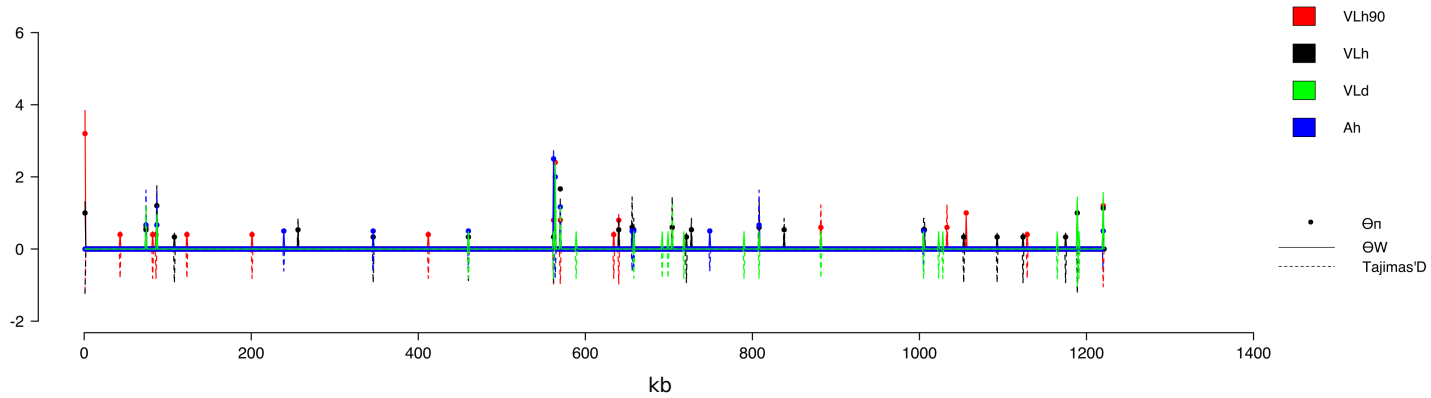

Chr30

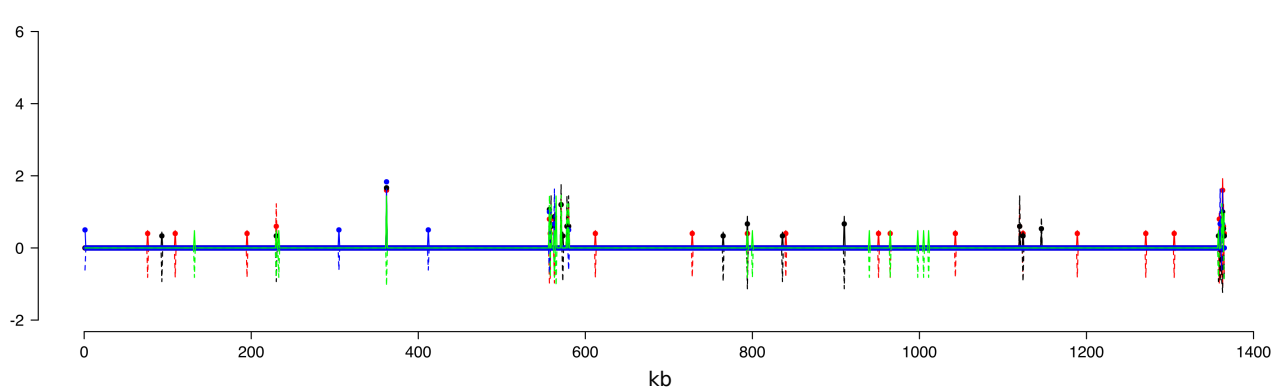

Chr31

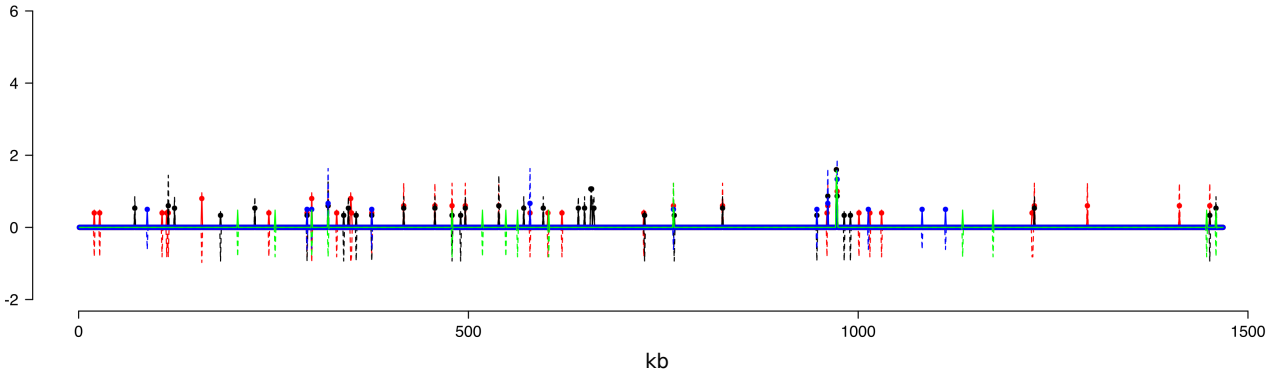

Chr32

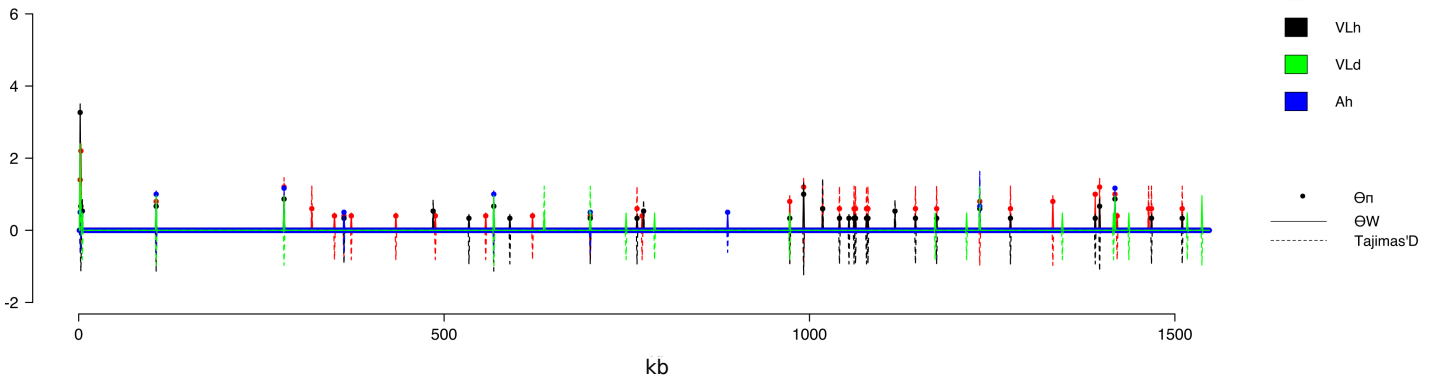

Chr33

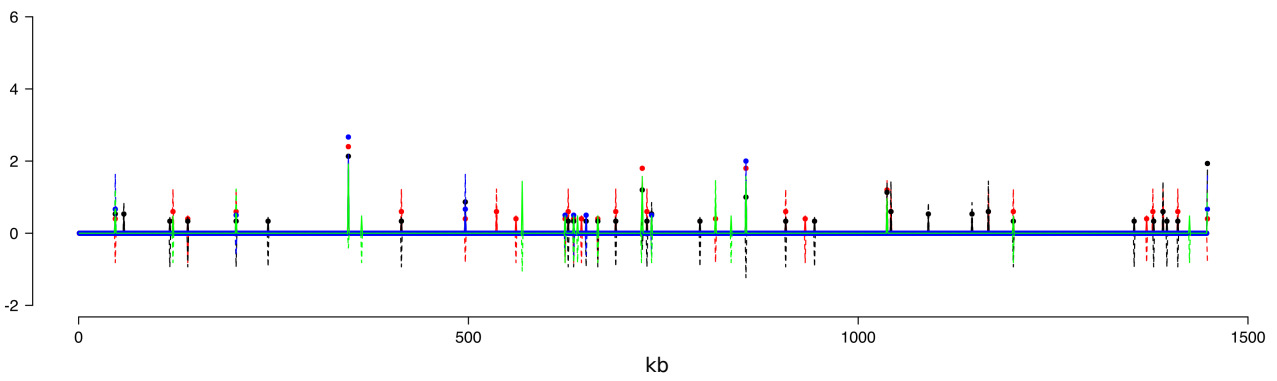

Chr34

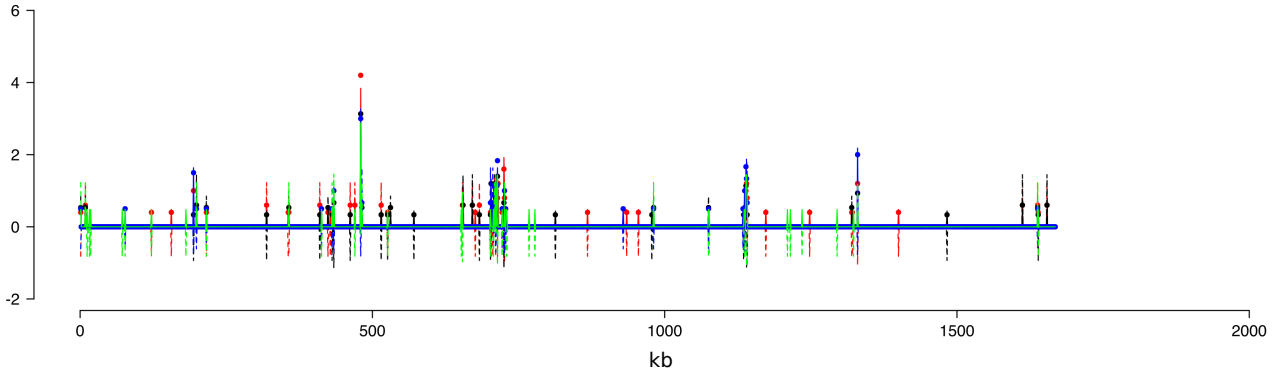

Chr35

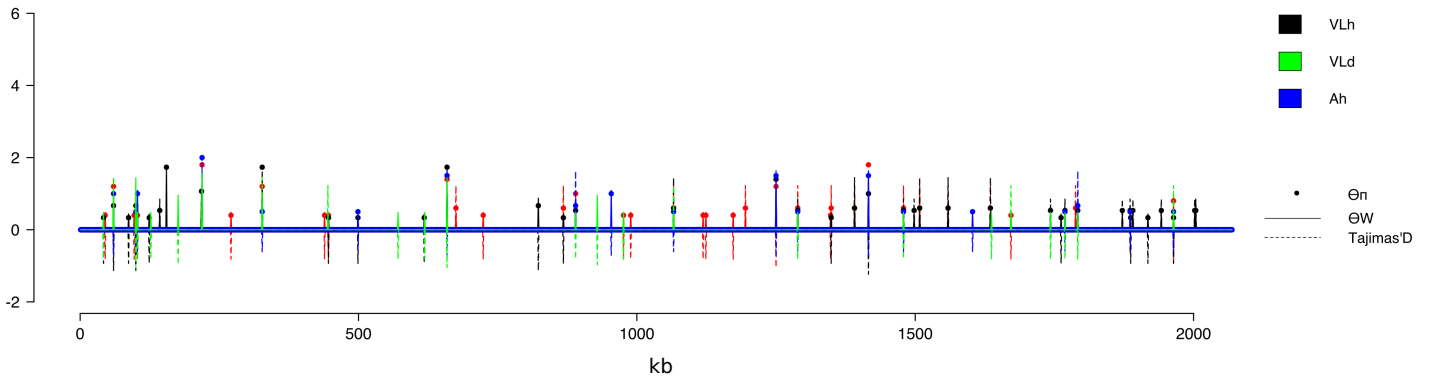

Chr36

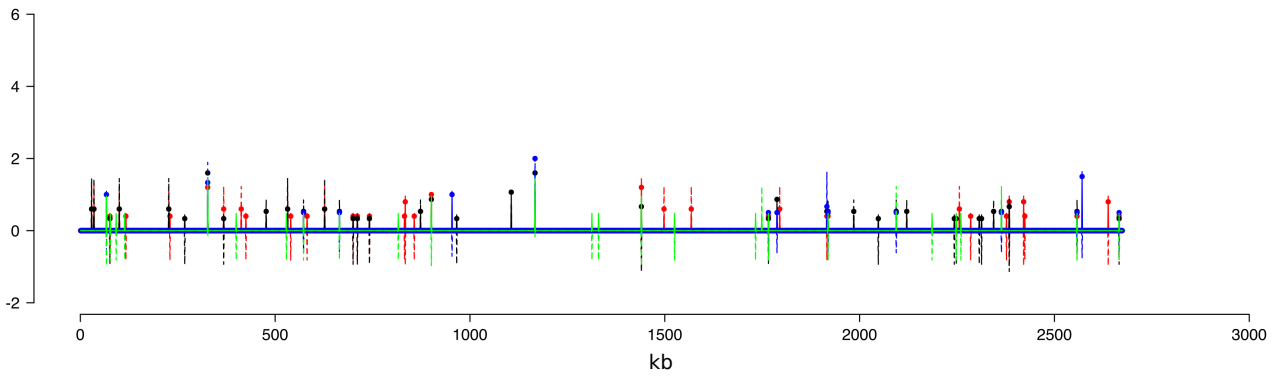

Supplement: NIHMS909944-supplement-Figure_S8.pdf [file NIHMS909944-supplement-Figure_S8.pdf]
